# Supplementary material
Source: PubMed Central journal article supplement (PMC9361320)

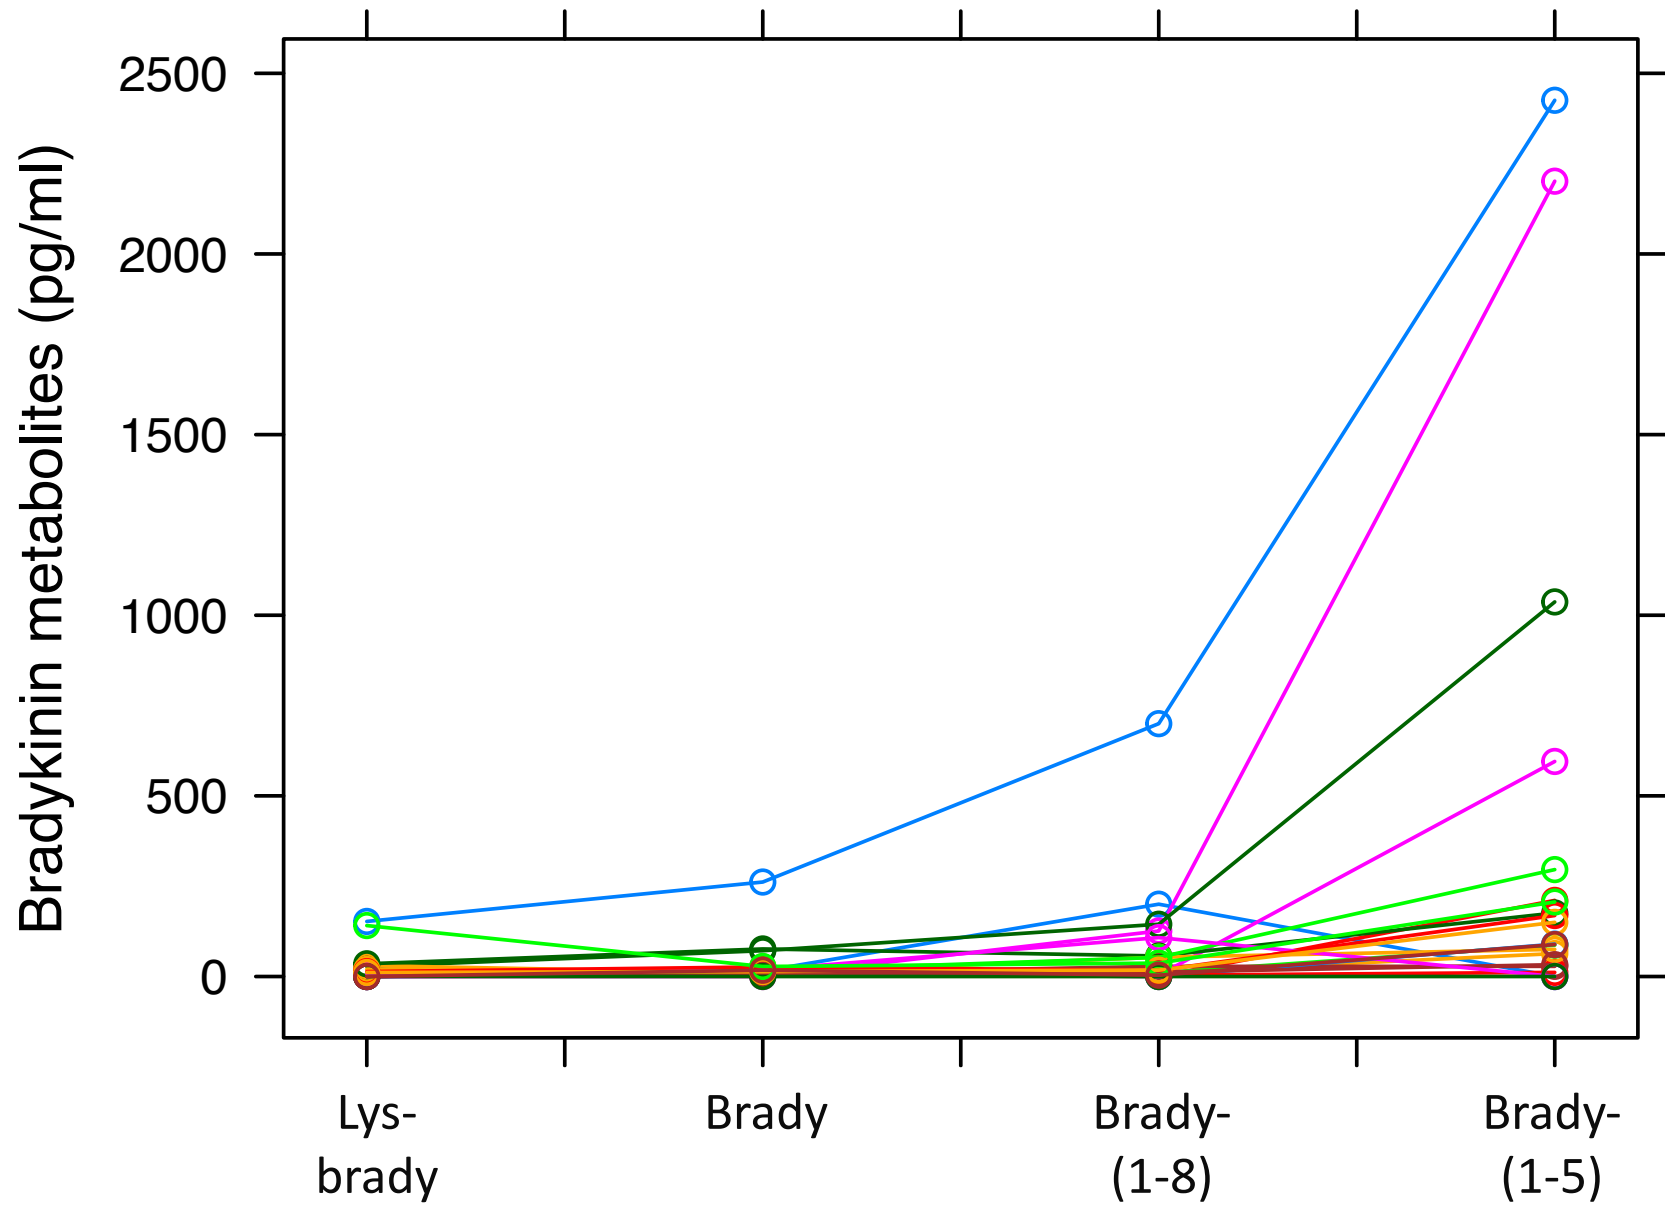

Supplement: mmc2.pdf [file mmc2.pdf]

**A**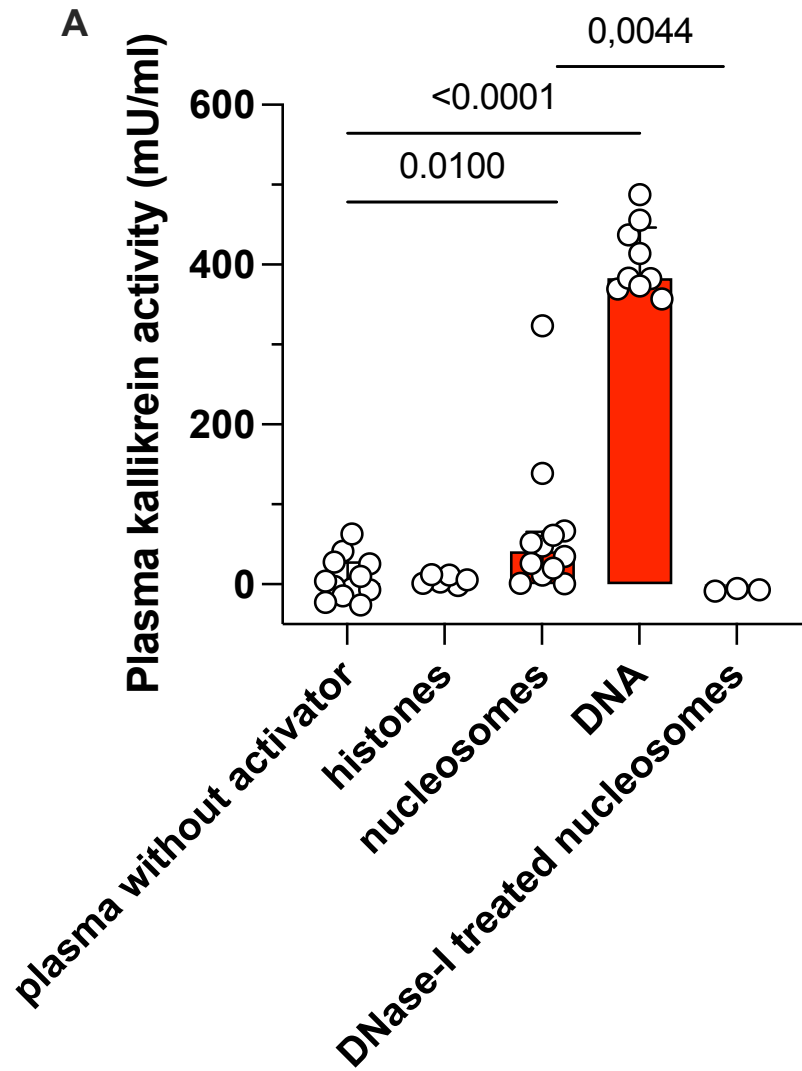**B**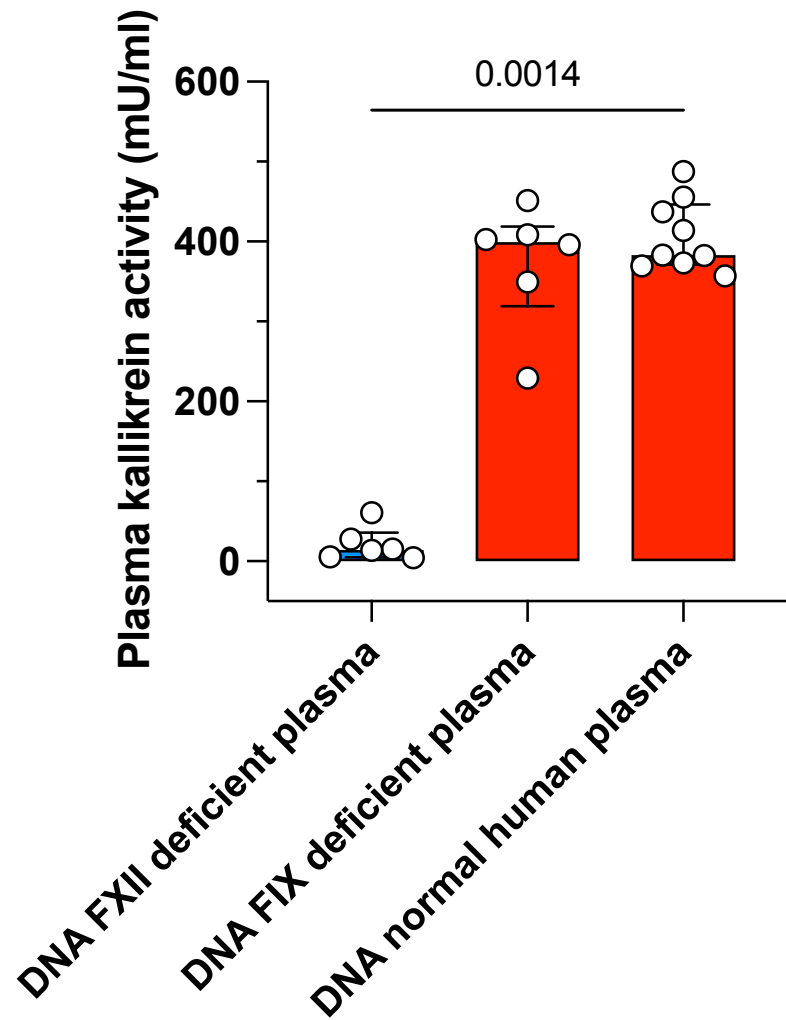

Supplement: mmc3.pdf [file mmc3.pdf]
